# Supplementary material for: Characterizing Circulating Tumor Cells and Tumor-Derived Extracellular Vesicles in Metastatic Castration-Naive and Castration-Resistant Prostate Cancer Patients
Source: MDPI journal article supplement (doi:10.3390/cancers14184404), 2022-09-10
Supplement: s1 [file s1]

**Table S1.** Spearman Rho test - correlation of CTCs and CTC sunglasses to tdEVs in CNPC and CRPC.

| CNPC patients                       |                                |                  | CRPC patients                       |                                |                  |
|-------------------------------------|--------------------------------|------------------|-------------------------------------|--------------------------------|------------------|
| Correlations with tdEVs_AC-<br>CEPT | Spearman Rho co-<br>efficients | <i>p</i> - value | Correlations with tdEVs_AC-<br>CEPT | Spearman Rho coeffi-<br>cients | <i>p</i> - value |
| CTC_Cluster                         | 0.56                           | < 0.001          | CTC_Cluster                         | 0.78                           | < 0.001          |
| CTC_Pretty                          | 0.68                           | < 0.001          | CTC_Pretty                          | 0.69                           | < 0.001          |
| CTC_Heterogenous_CK                 | 0.81                           | < 0.001          | CTC_Heterogenous_CK                 | 0.86                           | < 0.001          |
| CTC_Cleaved_CK                      | 0.67                           | < 0.001          | CTC_Cleaved_CK                      | 0.82                           | < 0.001          |
| CTC_Fragmented_DNA                  | 0.57                           | < 0.001          | CTC_Fragmented_DNA                  | 0.55                           | < 0.001          |
| CTC_Cleaved_Fragmented              | 0.66                           | < 0.001          | CTC_Cleaved_Fragmented              | 0.66                           | < 0.001          |
| CTC_ACCEPT_Corrected                | 0.84                           | < 0.001          | CTC_ACCEPT_Corrected                | 0.92                           | < 0.001          |

**Table S2.** CTC and tdEV counts from manual, ACCEPT and ACCEPT corrected analysis.

| CNPC ( <i>n</i> = 104) |                  |                     |                      |                     | CRPC ( <i>n</i> = 66) |                      |                                                                                          |
|------------------------|------------------|---------------------|----------------------|---------------------|-----------------------|----------------------|------------------------------------------------------------------------------------------|
|                        |                  | 0 CTC               | 1 ≤ CTC < 5          | CTC ≥ 5             |                       |                      |                                                                                          |
|                        |                  | Range<br>(Mean, SD) | Range<br>(Mean, SD)  | Range<br>(Mean, SD) |                       |                      | Range<br>(Mean, SD)                                                                      |
| CTC                    | manual           | -                   | 1–4 (1.8, 0.9)       | 5–1903 (163, 333)   | -                     | 1–4 (2, 1.14)        | 5–378 (62.6, 83.4)                                                                       |
| tdEV                   | ACCEPT           | 0–49 (5.79, 7.40)   | 1–252 (30.33, 47.59) | 8–3373 (657, 915)   | 0–12 (5, 4)           | 2–138 (34.31, 33.86) | 28–2196 (409, 547)                                                                       |
|                        |                  |                     |                      |                     |                       |                      | $p = 0.005$<br>$p = 0.937$ (CTC = 0)<br>$p = 0.3$ (1 ≤ CTC < 5)<br>$p = 0.806$ (> 5 CTC) |
| CTC                    | ACCEPT           | -                   | 1–4 (1.92, 0.96)     | 5–1046 (77, 150)    | -                     | 1–4 (2.37, 1.02)     | 2–252 (45.82, 56.03)                                                                     |
| CTC                    | ACCEPT corrected | -                   | 1–4 (1.92, 0.95)     | 5–851 (107, 178)    | -                     | 1–4 (1.93, 0.92)     | 5–229 (37.93, 48.93)                                                                     |
|                        |                  |                     |                      |                     |                       |                      | $p = 0.013$<br>$p = 0.888$<br>1 ≤ CTC < 5<br>$p = 0.146$ (> 5 CTC)                       |

**Table S3.** CTC subclasses (%) in CNPC and CRPC patients. .

| CNPC ( <i>n</i> = 104) |  |                             | CRPC ( <i>n</i> = 66)       |                             |                             |
|------------------------|--|-----------------------------|-----------------------------|-----------------------------|-----------------------------|
|                        |  | 1 ≤ CTC < 5                 | CTC ≥ 5                     | 1 ≤ CTC < 5                 | CTC ≥ 5                     |
|                        |  | % of CTC<br>Range, mean, SD |
| CTC clusters           |  | 3.84%<br>0–1 (0.07, 0.26)   | 3.97%<br>0–49 (4.27, 10.09) | 0                           | 6.01%<br>0–8 (2.28, 2.34)   |
| Pretty CTCs            |  | 9.61%                       | 24.95%                      | 9.67%                       | 27.34%                      |
|                        |  |                             |                             |                             | $p = 0.006$                 |
|                        |  |                             |                             |                             | $p = 0.069$                 |

|                             |                            |                                |                            |                               |             |
|-----------------------------|----------------------------|--------------------------------|----------------------------|-------------------------------|-------------|
|                             | 0–1 (0.18, 0.39)           | 0–201 (26.82, 48.89)           | 0–1 (0.18, 0.40)           | 0–89 (10.37, 21.84)           |             |
| Heterogenous CTC            | 61.53%<br>0–3 (1.18, 0.96) | 47.22%<br>3–598 (50.75, 111)   | 67.74%<br>0–4 (1.31, 1.3)  | 40.60%<br>3–45 (15.40, 11.89) | $p = 0.041$ |
| Cleaved CK                  | 15.38%<br>0–2 (0.29, 0.54) | 14.95%<br>0–160 (16.06, 34.56) | 6.45%<br>0–1 (0.12, 0.34)  | 15.81%<br>0–60 (6, 12.81)     | $p = 0.052$ |
| Fragmented DNA/CK           | 1.92%<br>0–1 (0.03, 0.19)  | 1.99%<br>0–15 (2.14, 3.8.4)    | 3.22%<br>0–1 (0.06, 0.25)  | 3.29%<br>0–13 (1.25, 2.98)    | $p = 0.349$ |
| Cleaved CK + Fragmented DNA | 7.69%<br>0–1 (0.14, 0.36)  | 6.89%<br>0–71 (7.41, 14.48)    | 12.90%<br>0–1 (0.25, 0.44) | 6.91%<br>0–20 (2.62, 4.72)    | $p = 0.357$ |
